# Supplementary material for: Background Tests and Improvements at LAC-UFF Aiming at Sample Size Reduction in Foraminifera 14C Measurement
Source: MDPI journal article supplement (doi:10.3390/geographies3030030), 2023-09-01
Supplement: s1 [file s1]

# Supplementary Material: Background Tests and Improvements at LAC-UFF Aiming at Sample Size Reduction in Foraminifera $^{14}\text{C}$ Measurement

Bruna M. Netto <sup>1,2</sup>, Kita D. Macario <sup>1,2\*</sup>, Ayrton Assumpção <sup>1</sup>, Maikel Diaz <sup>1,3</sup>, Stewart J. Fallon <sup>4</sup>, Xiaomei Xu <sup>5</sup>, Ingrid Chanca <sup>1,6</sup> and Carla Carvalho <sup>1,2</sup>

<sup>1</sup> Radiocarbon Laboratory, Physics Institute, Fluminense Federal University, Niterói 24210-346, Brazil; brunanetto@id.uff.br (B.M.N.);

maikel@instec.cu (M.D.); ichanca@id.uff.br (I.C.)

<sup>2</sup> Graduate Program in Geosciences (Environmental Geochemistry), Fluminense Federal University, Niterói 24020-141, Brazil

<sup>3</sup> Higher Institute of Technologies and Applied Sciences, Habana University, Plaza de la Revolución, Havana 10400, Cuba

<sup>4</sup> Radiocarbon Laboratory, Research School of Earth Sciences, The Australian National University, Canberra, ACT 2601, Australia

<sup>5</sup> Keck Carbon Cycle AMS Facility, Department of Earth System Science, University of California, Irvine, CA 92697-3100, USA

<sup>6</sup> Max-Planck-Institut für Biogeochemie, 07745 Jena, Germany

\* Correspondence: kitamacario@id.uff.br

**Table S1:** pMC values (uncorrected) for regular-sized CA background samples using graphitization tubes stored in different conditions.

| Sample Code | Lab | Storage Time              | pMC  | Uncertainty |
|-------------|-----|---------------------------|------|-------------|
| 190104      | ANU | Prebaked/Immediately used | 0.91 | 0.16        |
| 190103      | ANU | Prebaked/Immediately used | 0.86 | 0.16        |
| 190102      | ANU | Prebaked/Immediately used | 0.78 | 0.16        |
| 190101      | ANU | 7 days                    | 0.95 | 0.16        |
| 190100      | ANU | 7 days                    | 1.09 | 0.16        |
| 190099      | ANU | 7 days                    | 0.71 | 0.16        |
| 190098      | ANU | 30 days                   | 0.99 | 0.16        |
| 190097      | ANU | 30 days                   | 1.07 | 0.16        |
| 190284      | ANU | Non-prebaked GT           | 1.99 | 0.05        |
| 190285      | ANU | Non-prebaked GT           | 2.19 | 0.04        |
| 190286      | ANU | Non-prebaked GT           | 2.17 | 0.05        |

**Table S2:** Sample sizes and pMC results for all tested sample materials, using prebaked GT.

| Sample Code | Lab | Type | Initial Mass (mg) | C (mg) | pMC | Uncertainty | Time to Measure |
|-------------|-----|------|-------------------|--------|-----|-------------|-----------------|
|-------------|-----|------|-------------------|--------|-----|-------------|-----------------|

|        |         |    |       |       |                           |      |             |
|--------|---------|----|-------|-------|---------------------------|------|-------------|
|        | MPI-BGC | ER | 1.10  | 0.098 | Failed during measurement |      |             |
| 190385 | LAC-UFF | ER | 1.30  | 0.114 | 1.72                      | 0.06 | Immediately |
| 190265 | MPI-BGC | ER | 3.20  | 0.263 | 1.02                      | 0.04 | 4 months    |
| 190386 | LAC-UFF | ER | 3.30  | 0.225 | 1.02                      | 0.03 | Immediately |
| 190266 | MPI-BGC | ER | 4.80  | 0.376 | 0.74                      | 0.04 | 4 months    |
| 190387 | LAC-UFF | ER | 5.10  | 0.461 | 0.93                      | 0.03 | Immediately |
| 190267 | MPI-BGC | ER | 6.90  | 0.574 | 0.89                      | 0.04 | 4 months    |
| 190388 | LAC-UFF | ER | 6.90  | 0.353 | 0.98                      | 0.03 | Immediately |
| 190268 | MPI-BGC | ER | 9.90  | 0.725 | 0.75                      | 0.03 | 4 months    |
| 190389 | LAC-UFF | ER | 10.60 | 0.851 | 0.84                      | 0.03 | Immediately |
| 190269 | MPI-BGC | CA | 1.10  | 0.155 | 2.11                      | 0.09 | 2 months    |
| 190390 | LAC-UFF | CA | 1.00  | 0.060 | 3.97                      | 0.14 | Immediately |
| 190270 | MPI-BGC | CA | 2.80  | 0.215 | 1.53                      | 0.07 | 2 months    |
| 190391 | LAC-UFF | CA | 3.00  | 0.147 | 1.73                      | 0.06 | Immediately |
| 190271 | MPI-BGC | CA | 5.00  | 0.483 | 1.08                      | 0.08 | 2 months    |
| 190392 | LAC-UFF | CA | 4.80  | 0.364 | 1.17                      | 0.04 | Immediately |
| 190272 | MPI-BGC | CA | 6.90  | 0.698 | 0.87                      | 0.06 | 2 months    |
| 190393 | LAC-UFF | CA | 7.0   | 0.549 | 0.76                      | 0.03 | Immediately |
| 190273 | MPI-BGC | CA | 10.10 | 0.880 | 0.74                      | 0.03 | 2 months    |
| 190394 | LAC-UFF | CA | 10.2  | 0.808 | 0.96                      | 0.03 | Immediately |
| 190538 | LAC-UFF | C1 | 1.20  | 0.126 | 1.23                      | 0.05 | Immediately |
| 190539 | LAC-UFF | C1 | 3.10  | 0.296 | 0.84                      | 0.04 | Immediately |
| 190541 | LAC-UFF | C1 | 5.00  | 0.501 | 0.62                      | 0.03 | Immediately |
| 190542 | LAC-UFF | C1 | 7.20  | 0.676 | 0.61                      | 0.02 | Immediately |
| 190543 | LAC-UFF | C1 | 10.00 | 0.991 | 0.60                      | 0.02 | Immediately |

**Table S3:** Sample sizes and pMC results for all tested sample materials, using non-prebaked GT.

| Sample Code | Lab     | Type | Initial Mass (mg) | C (mg) | pMC  | Uncertainty | Time        |
|-------------|---------|------|-------------------|--------|------|-------------|-------------|
| 190274      | MPI-BGC | ER   | 1.10              | 0.114  | 14.2 | 0.56        | 4 months    |
| 190440      | LAC-UFF | ER   | 1.40              | 0.149  | 4.01 | 0.06        | Immediately |
| 190275      | MPI-BGC | ER   | 3.10              | 0.165  | 4.2  | 0.1         | 4 months    |
| 190441      | LAC-UFF | ER   | 2.90              | 0.257  | 2.78 | 0.04        | Immediately |
| 190276      | MPI-BGC | ER   | 5.00              | 0.334  | 2.36 | 0.06        | 4 months    |
| 190442      | LAC-UFF | ER   | 5.10              | 0.537  | 1.55 | 0.03        | Immediately |
| 190277      | MPI-BGC | ER   | 7.60              | 0.799  | 0.89 | 0.03        | 4 months    |
| 190443      | LAC-UFF | ER   | 6.90              | 0.717  | 1.14 | 0.02        | Immediately |
| 190278      | MPI-BGC | ER   | 10.20             | 0.883  | 0.97 | 0.03        | 4 months    |
| 190444      | LAC-UFF | ER   | 10.50             | 1.103  | 0.97 | 0.02        | Immediately |
| 190279      | MPI-BGC | CA   | 1.20              | 0.088  | 7.1  | 0.20        | 4 months    |
| 190445      | LAC-UFF | CA   | 1.20              | 0.098  | 6.11 | 0.11        | Immediately |
| 190280      | MPI-BGC | CA   | 3.10              | 0.252  | 2.52 | 0.07        | 4 months    |
| 190446      | LAC-UFF | CA   | 3.10              | 0.303  | 2.01 | 0.03        | Immediately |

|               |         |    |       |       |      |      |             |
|---------------|---------|----|-------|-------|------|------|-------------|
| <b>190281</b> | MPI-BGC | CA | 5.10  | 0.461 | 1.65 | 0.05 | 4 months    |
| <b>190447</b> | LAC-UFF | CA | 4.85  | 0.378 | 1.71 | 0.03 | Immediately |
| <b>190282</b> | MPI-BGC | CA | 7.10  | 0.683 | 1.20 | 0.04 | 4 months    |
| <b>190448</b> | LAC-UFF | CA | 6.96  | 0.566 | 1.22 | 0.03 | Immediately |
| <b>190283</b> | MPI-BGC | CA | 10.10 | 0.883 | 0.96 | 0.03 | 4 months    |
| <b>190449</b> | LAC-UFF | CA | 10.14 | 0.676 | 0.91 | 0.02 | Immediately |

---
